# Supplementary material for: Attenuated Superoxide Dismutase 2 Activity Induces Atherosclerotic Plaque Instability During Aging in Hyperlipidemic Mice
Source: PubMed Central journal article supplement — J Am Heart Assoc. 2017 Oct 27;6(11):e006775. doi: 10.1161/JAHA.117.006775 (PMC5721769; doi:10.1161/jaha.117.006775), 2017-10-27

## Supplementary Materials

### Supplemental Figure Legends

**Figure S1.** Plasma lipids levels in young and aged *Apoe*<sup>-/-</sup> compared with *Apoe*<sup>-/-</sup>/*Sod2*<sup>+/-</sup> mice. A-B, Plasma levels of total cholesterol (A) and triglycerides (B). Data are mean ± SEM, n=12.

**Figure S2.** Transfection of VSMC from middle-age wild-type mice with *Capn2* siRNA:p5RHH nanocomplexes effectively reduces calpan-2 but not calpain-1 expression levels. Western blot analysis of calpain-2 and calpain-1 expression in VSMC transfected with scrambled siRNA or *Capn2* siRNA:p5RHH nanocomplexes.

Figure S3. Features of plaque VSMC transdifferentiation to macrophage-like cells in *Apoe*<sup>-/-</sup> and *Apoe*<sup>-/-</sup>/*Sod2*<sup>+/-</sup> mice. (A) Representative fluorescent microscopy images of fresh frozen transverse aortic sections stained for immunoreactive CD68 (red), smooth muscle SM-MHC (green), and DAPI (blue) and quantification of proportion of CD68<sup>+</sup> SM-MHC<sup>+</sup> cells relative to total core CD68<sup>+</sup> cells (mean ± SEM, n=6). (B) Representative fluorescent microscopy images of fresh frozen transverse aortic sections stained for immunoreactive Mac3 (green), smooth muscle α-actin (red), and DAPI (blue) and quantification of proportion of Mac3<sup>+</sup> α-actin<sup>+</sup> cells relative to total plaque Mac3<sup>+</sup> cells (mean ± SEM, n=6). \**P*<0.05. Scale is 100 μm.

**Figure S4.** Systemic effects of MitoTEMPO treatment in middle-aged *Apoe*<sup>-/-</sup> and *Apoe*<sup>-/-</sup>/*Sod2*<sup>+/-</sup> mice. A-E, Plasma levels of total cholesterol (A), triglycerides (B), blood urea nitrogen (BUN) (C), creatinine (D), and alanine aminotransferase (E). Data are mean ± SEM, n=8. F-G, Representative images of mouse kidney (F) and liver (G) sections stained with H&E. N=4. Scale is 100 μm.

**Figure S5.** MMP2 expression in CD68<sup>+</sup> macrophages in atherosclerotic lesions of middle-aged mice treated with MitoTEMPO. Representative fluorescent microscopy images of fresh frozen

transverse aortic sections stained for immunoreactive MMP2 (green), CD68 (red) and DAPI (blue) and quantification of MMP2 expression in CD68<sup>+</sup> cells represented as fluorescence integrated density (IntDen) per number of cells (mean  $\pm$  SEM, n=6). Scale is 100  $\mu$ m. \* $P$ <0.05; \*\* $P$ <0.01.

Figure S1.

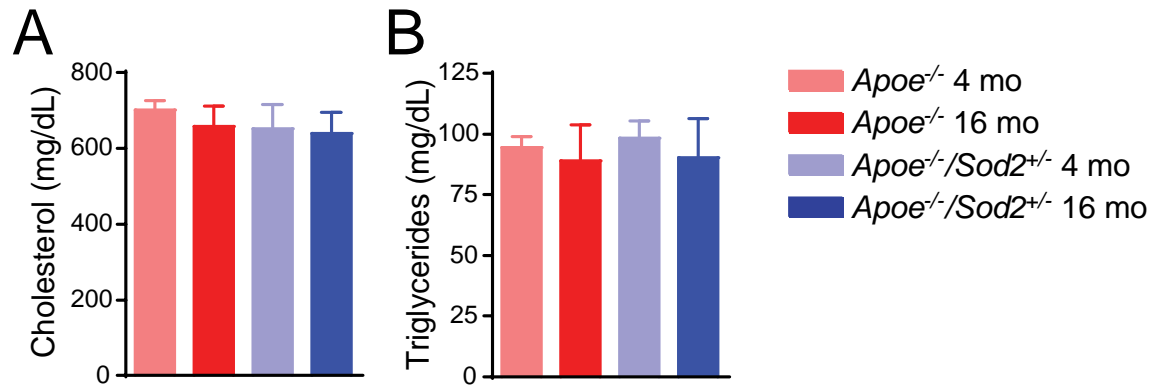

**Figure S2.**

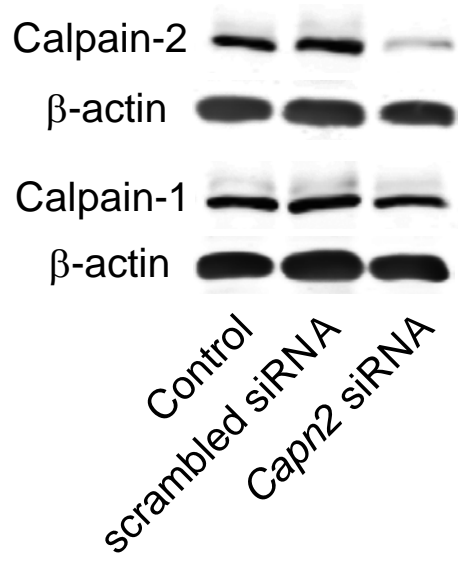

Figure S3.

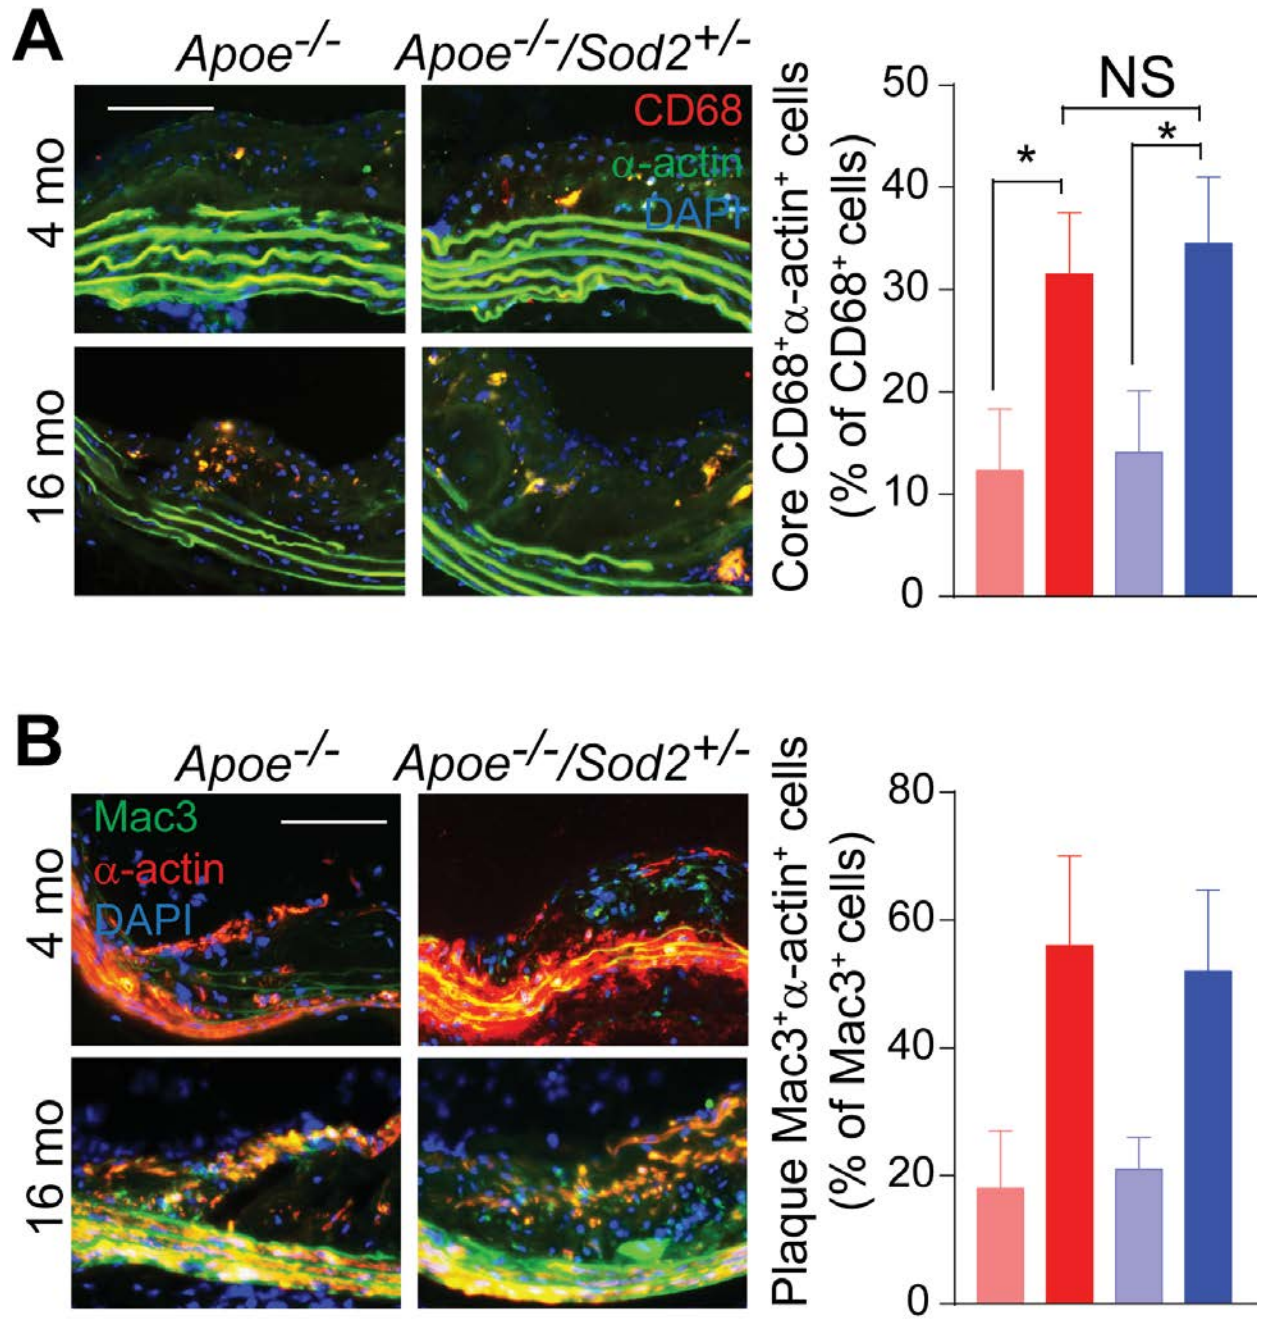

**Figure S4.**

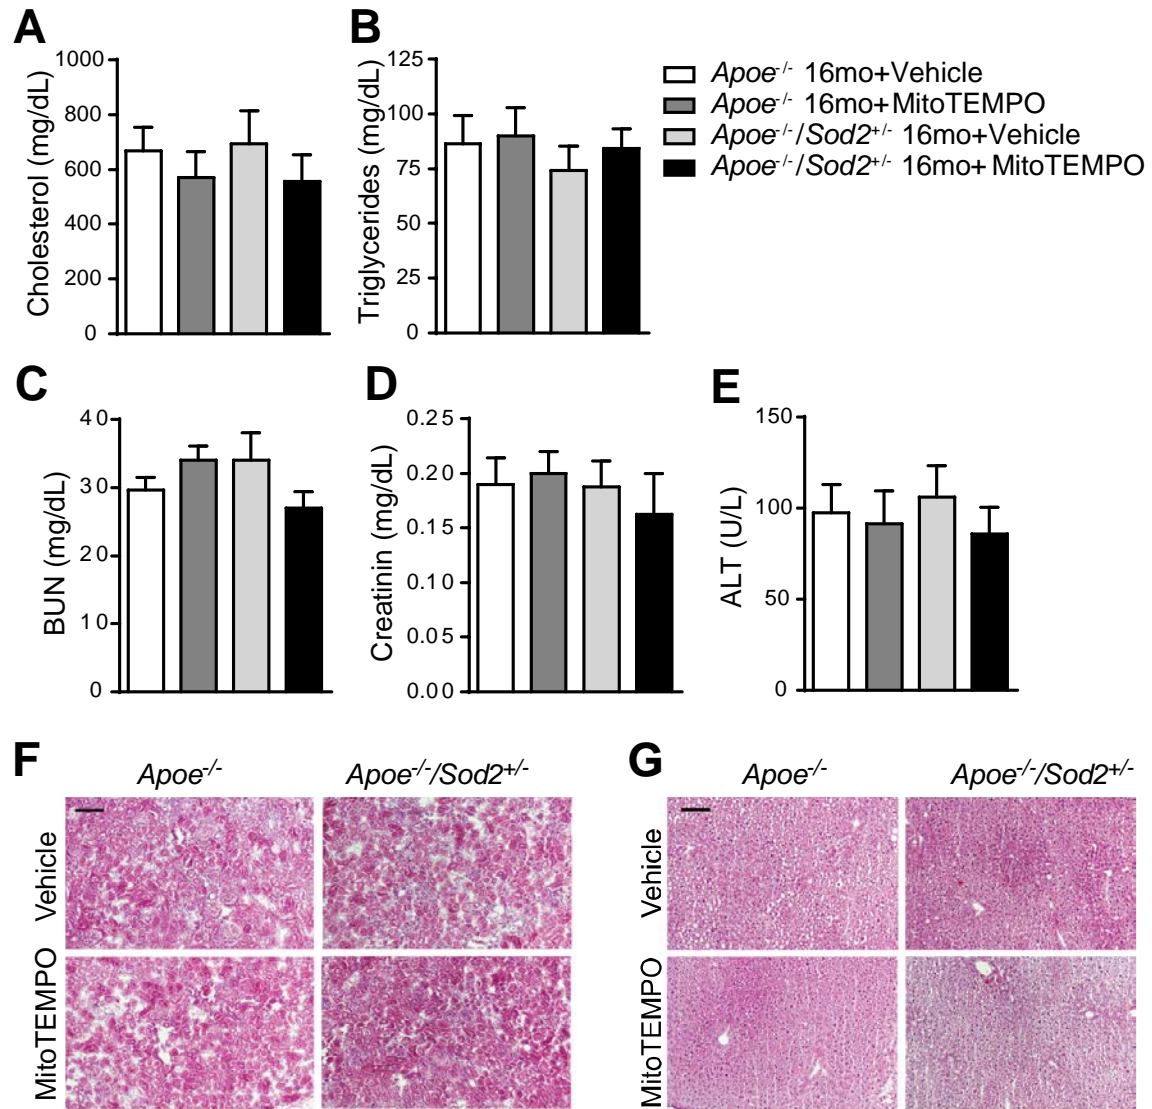

Figure S5.

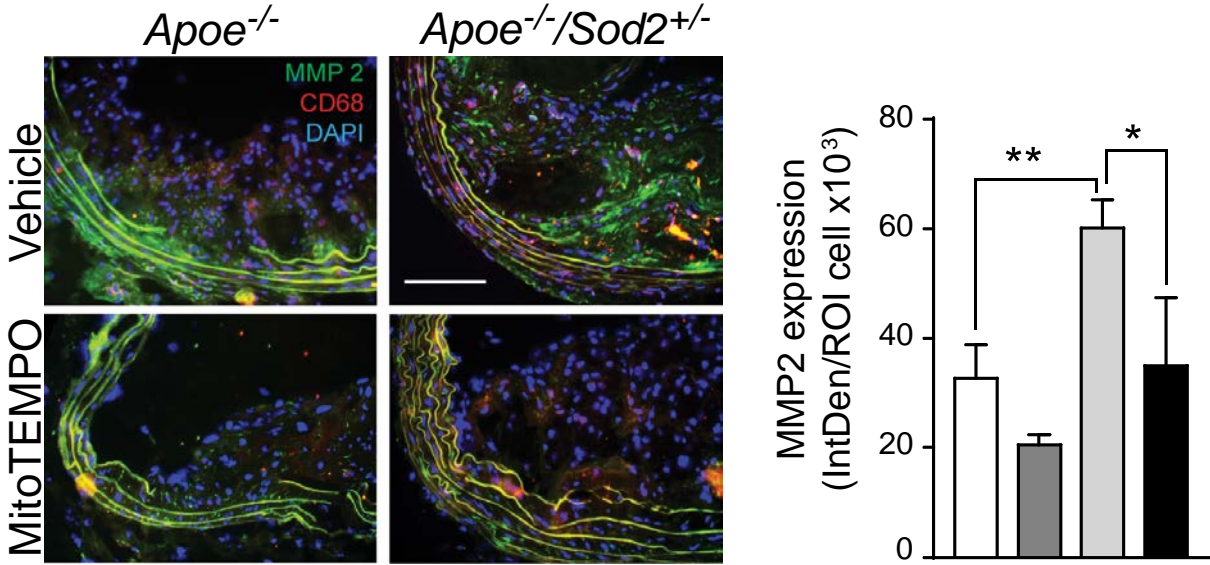

Supplement: JAH3-6-e006775-s001.pdf [file JAH3-6-e006775-s001.pdf]
